# Supplementary material
Source: MDPI journal article supplement (https://www.mdpi.com/2072-4292/13/18/3692)
Supplement: s1 [file s1]

Archive with 3 entries (3 files):
- SUPPLEMENTARY FILE S1_10092021.pdf
- SUPPLEMENTARY FILE S2_10092021.pdf
- SUPPLEMENTARY FILE S3_06092021.pdf
