# Supplementary material
Source: MDPI journal article supplement (https://www.mdpi.com/2072-4292/13/18/3692)
Supplement: s1 [file s1 › SUPPLEMENTARY FILE S3_06092021.pdf]

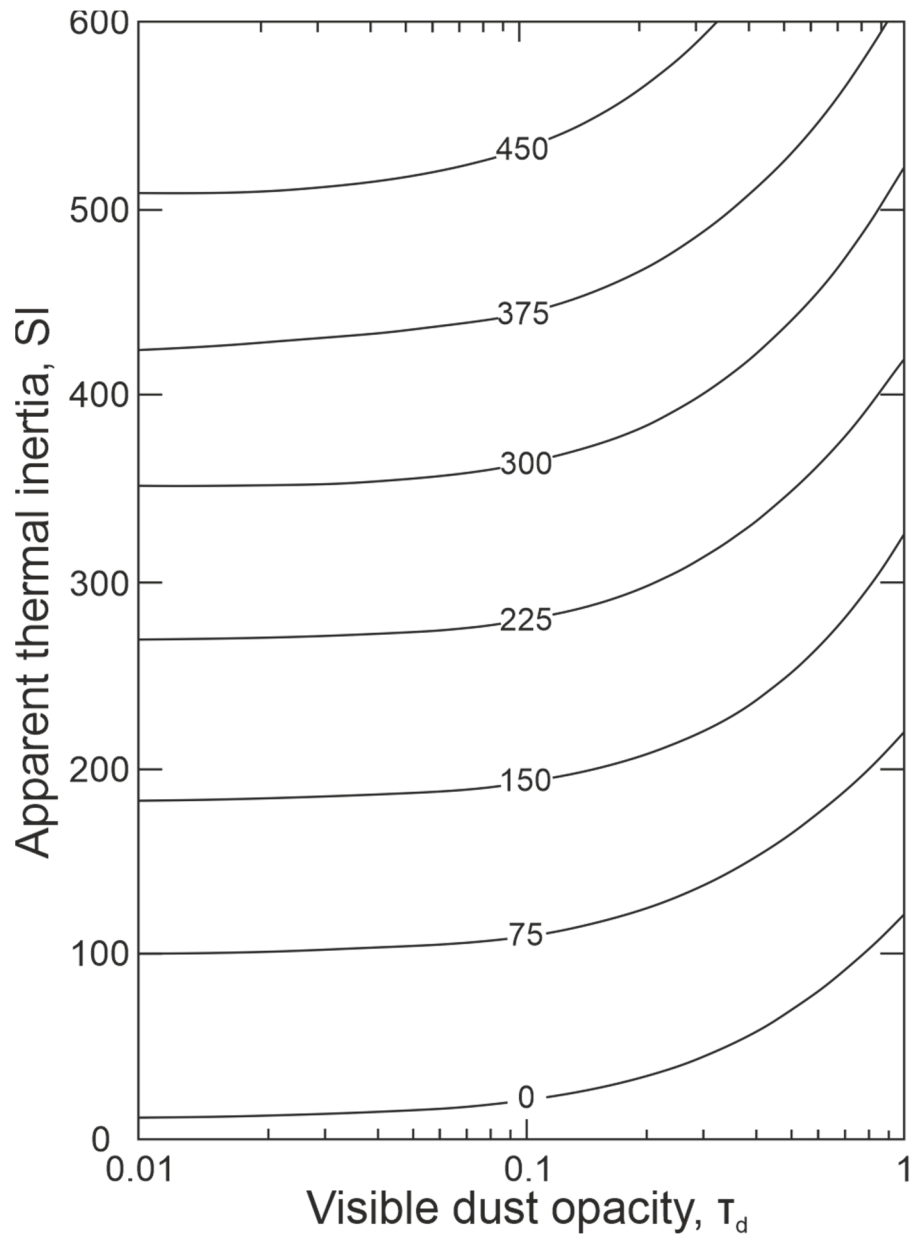

**Figure S1.** Apparent thermal inertia as a function of visible dust opacity. Redrawn from Haberle and Jakosky [14].
